# Supplementary material for: Auditory processing ability in Thai native speakers with the Gaps-In-Noise (GIN) test
Source: PeerJ. 2025 Nov 6;13:e20207. doi: 10.7717/peerj.20207 (PMC12598593; doi:10.7717/peerj.20207)
Supplement: Supplemental Information 2 [file peerj-13-20207-s002.xlsx]

## Sheet: Sheet1
Participants	Age	Sex										PTA									PTA	SRT		SDS		Both ear		Rt ear		Lt ear
				250 Hz (R)	500 Hz (R)	1000 Hz (R)	2000 Hz (R)	3000 Hz (R)	4000 Hz (R)	6000 HZ (R)	8000 Hz (R)	Rt ear	250 Hz (L)	500 Hz (L)	1000 Hz (L)	2000 Hz (L)	3000 (L)	4000 Hz(L)	6000 HZ (L)	8000 Hz (L)	Lt ear	Rt ear	Lt ear	Rt ear	Lt ear	Gap(ms)	% Corrrect	Gap(ms)	% Corrrect	Gap(ms)	% Corrrect
1	22.16		Female	2	5	3	5	9	9	8	1	5.5	5	4	8	3	4	9	10	3	6	7	8	100	100	6	63.33	6	60	6	61.67
2	22.33		Female	0	1	7	2	3	3	0	8	3.25	1	2	6	2	1	4	8	-4	3.5	6	4	100	100	5	66.67	6	63.33	6	61.67
3	24	Male		6	8	5	4	2	5	8	10	5.5	5	4	9	4	1	7	4	2	6	8	6	100	100	5	71.67	5	66.67	5	66.67
4	20.58	Male		10	4	11	8	8	11	4	8	8.5	5	5	10	12	10	12	10	25	9.75	8	9	100	100	5	75	4	83.33	5	75
5	20.67	Male		0	5	7	0	7	2	0	0	3.5	7	5	5	0	2	4	0	0	3.5	5	5	100	100	4	71.67	5	71.67	5	73.33
6	20.67		Female	7	6	3	1	2	2	11	2	3	3	1	3	5	1	0	4	7	2.25	5	4	100	95	4	83.33	4	81.67	4	75
7	20.5	Male		9	12	5	2	7	10	7	1	7.25	-1	3	9	3	3	6	3	-1	5.25	9	7	100	100	5	71.67	5	70	4	76.67
8	20.25		Female	2	7	8	4	7	4	0	-1	5.75	1	1	6	13	7	6	10	2	6.5	12	12	100	100	5	75	4	80	4	81.67
9	19.75	Male		5	10	9	6	6	6	8	8	7.75	3	11	7	8	9	8	3	1	8.5	12	11	100	100	6	61.67	6	58.33	6	58.33
10	19.58	Male		11	6	8	6	7	6	-4	-1	6.5	7	3	5	4	5	3	-4	-6	3.75	9	10	100	100	6	60	6	66.67	6	66.67
11	21.5		Female	11	13	15	16	14	16	13	10	15	16	15	14	14	15	13	10	15	14	18	18	100	100	6	63.33	6	65	6	70
12	21.75		Female	10	10	8	6	11	7	10	17	7.75	6	7	7	8	3	11	0	-1	8.25	10	9	100	100	5	73.33	5	66.67	5	70
13	19.83		Female	3	8	8	17	17	15	9	8	12	2	4	9	17	10	6	5	6	9	13	9	100	100	5	75	6	70	6	70
14	19.58		Female	12	10	6	4	6	4	0	-4	6	8	8	8	7	2	1	6	-1	6	12	10	100	100	5	65	5	65	6	63.33
15	20.33	Male		9	10	7	8	7	6	0	8	7.75	10	8	8	9	13	10	8	9	8.75	14	14	100	100	4	81.67	4	81.67	3	85
16	20.42	Male		9	8	6	5	4	7	3	2	6.5	10	6	4	11	5	0	3	3	5.25	9	10	100	100	5	71.67	4	75	5	71.67
17	20.58	Male		2	8	8	4	0	0	3	7	5	1	3	6	2	3	2	0	8	3.25	10	9	100	100	3	86.67	4	81.67	4	83.33
18	20	Male		4	10	13	9	11	4	2	0	9	3	8	15	7	9	3	6	6	8.25	14	13	100	100	5	70	6	61.67	6	70
19	19.67	Male		3	4	6	3	1	1	1	-5	3.5	2	1	5	4	3	2	0	-5	3	7	6	100	100	5	70	6	61.67	5	73.33
20	19.75		Female	11	7	6	10	5	2	-2	0	6.25	6	5	5	7	1	4	-2	0	5.25	10	9	100	100	6	65	6	65	6	63.33
21	19.16		Female	9	12	4	4	6	2	4	0	5.5	12	15	4	2	4	3	1	-1	6	11	9	100	100	5	68.33	6	61.67	5	65
22	18	Male		5	4	4	3	1	4	6	5	3.75	4	2	5	2	4	6	4	4	3.75	8	8	100	100	4	83.33	4	85	4	90
23	18.83		Female	15	12	9	5	4	15	1	7	10.25	10	8	8	5	4	17	0	9	9.5	12	11	100	100	6	65	5	71.67	5	68.33
24	18.67	Male		5	3	4	6	2	4	0	4	4.25	8	3	6	9	4	4	-2	0	5.5	10	9	100	100	5	70	5	68.33	5	71.67
25	18.5	Male		-2	8	2	2	1	1	4	4	3.25	-1	6	3	0	4	6	2	0	3.75	8	8	100	100	5	71.67	5	68.33	5	71.67
26	18.83		Female	6	6	8	8	7	10	12	10	8	8	7	10	7	10	10	10	12	8.5	13	12	100	100	5	73.33	5	68.33	5	71.67
27	19.42	Male		9	12	10	9	11	9	-2	0	10	6	9	8	5	8	8	-6	-5	7.5	13	12	100	100	5	75	4	83.33	5	75
28	19.33	Male		5	6	5	2	2	2	4	-2	3.75	6	8	5	1	1	1	5	-3	3.75	7	7	100	100	6	60	6	63.33	6	66.67
29	18.58		Female	5	6	5	6	11	6	-4	-6	5.75	7	6	4	4	10	6	-6	-4	5	10	9	100	100	5	73.33	6	70	6	70
30	18.91		Female	18	17	16	12	10	15	4	5	15	18	18	18	10	9	16	8	5	15.5	18	18	100	100	6	63.33	6	60	6	61.67
31	19.67	Male		11	9	10	11	9	0	-2	0	7.5	12	12	7	7	4	5	-1	-5	7.75	11	9	100	100	4	81.67	4	83.33	4	85
32	21.42	Male		6	4	5	3	5	0	-8	-10	3	7	6	7	0	0	-1	-9	-10	3	7	5	100	95	5	71.67	5	68.33	5	71.67
33	21.25	Male		14	14	14	13	6	7	3	3	12	12	16	16	11	10	7	4	1	12.5	14	13	100	100	5	73.33	5	66.67	5	70
34	21.58	Male		11	12	16	11	13	11	10	4	12.5	8	8	16	13	10	10	9	0	11.75	15	14	100	100	5	75	4	80	4	81.67
35	21.67	Male		4	6	5	6	4	9	9	1	6.5	4	3	7	8	8	9	5	5	6.75	12	12	100	100	5	71.67	6	61.67	6	70
36	22.42		Female	0	3	14	14	13	11	9	3	10.5	2	7	9	9	16	10	5	0	8.75	11	9	100	100	4	81.67	4	81.67	4	85
37	18.42	Male		4	4	2	3	2	3	-4	-10	3	-2	3	5	2	3	3	-5	-6	3.25	5	6	95	100	5	66.67	6	63.33	6	61.67
38	19	Male		3	7	7	4	2	9	16	2	6.75	3	1	5	4	2	11	5	-4	5.25	7	8	100	100	6	63.33	6	65	6	70
39	19.5		Female	12	16	13	7	3	10	6	1	11.5	10	12	10	6	5	9	-1	-6	9.25	12	10	100	100	5	71.67	5	66.67	5	66.67
40	19.67		Female	14	13	7	2	2	0	4	1	5.5	8	7	9	8	0	2	-2	-10	6.5	12	9	100	100	5	71.67	5	68.33	5	73.33
41	20.16	Male		5	6	5	3	2	1	4	-2	3.75	6	8	5	1	1	1	5	-3	3.75	6	6	100	100	5	70	6	63.33	5	73.33
42	20.42	Male		6	5	6	8	11	9	0	-2	7	7	6	4	4	10	8	0	4	5.5	8	7	100	100	5	75	5	68.33	5	73.33
43	19.42	Male		11	9	10	11	9	7	0	0	9.25	12	12	10	5	6	5	0	-5	8	12	12	100	100	5	71.67	4	75	5	73.33
44	19.75	Male		14	14	15	15	8	7	3	3	12.75	12	16	16	11	10	7	4	1	12.5	13	14	100	100	5	70	5	71.67	4	75
45	20.67		Female	6	4	5	4	5	0	-8	-10	3.25	7	6	7	2	2	0	-9	-10	3.75	6	6	100	100	5	71.67	5	70	4	76.67
46	20.25	Male		11	13	16	11	13	12	10	4	13	8	10	16	13	10	10	9	0	12.25	13	14	100	100	5	65	5	65	6	63.33
47	20.58		Female	4	6	5	6	4	9	9	1	6.5	4	5	7	8	8	9	5	5	7.25	8	8	100	100	5	68.33	6	63.33	5	65
48	20.83		Female	2	8	10	5	10	16	16	0	9.75	5	4	10	8	15	16	16	-1	9.5	10	10	100	100	4	83.33	4	81.67	4	75
49	19.91	Male		12	12	16	16	7	7	-1	-5	12.75	10	8	14	10	5	7	1	0	9.75	14	12	100	100	6	65	5	71.67	5	68.33
50	19.5	Male		3	6	8	6	3	0	-4	-8	5	5	7	6	6	2	4	-5	-5	5.75	9	8	100	100	4	86.67	4	81.67	4	81.67
51	19.83		Female	6	12	11	8	10	10	2	5	10.25	5	9	11	8	11	10	3	2	9.5	12	11	100	100	6	61.67	6	60	6	60
52	20.5		Female	6	10	9	3	1	0	-1	-2	5.5	3	4	7	3	1	2	0	-10	4	8	7	100	100	6	68.33	6	65	6	63.33
	20.1644	30	22	7.03846	8.28846	8.17308	6.67308	6.36538	6.26923	3.51923	1.63462	7.35096	6.26923	6.84615	8.15385	6.38462	5.84615	6.38462	2.67308	0.557692	6.94231	10.25	9.53846	99.9038	99.8077	5.03846	71.3465	5.11538	69.9362	5.07692	71.3785
